# Supplementary material for: Mycotoxins, Phytoestrogens and Other Secondary Metabolites in Austrian Pastures: Occurrences, Contamination Levels and Implications of Geo-Climatic Factors
Source: MDPI journal article supplement (doi:10.3390/toxins13070460), 2021-06-30
Supplement: s1 [file s1]

# Supplementary Materials: Mycotoxins, Phytoestrogens, and Other Secondary Metabolites in Austrian Pastures: Occurrences, Contamination Levels, and Implications of Geo-climatic Factors

Felipe Penagos-Tabares, Ratchaneewan Khiaosa-ard, Veronika Nagl, Johannes Faas, Timothy Jenkins, Michael Sulyok and Qendrim Zebeli

**Table S1.** List of 481 targeted metabolites via LC-MS/MS analysis. Compounds found in the pasture samples (values > the LOD) are located into grey cells.

|                           |                          |                        |                   |
|---------------------------|--------------------------|------------------------|-------------------|
| 15-Acetyldeoxynivalenol   | Aspyrone                 | Cladosporin            | Emindole SA       |
| 15-Hydroxyculmorin        | Asterric acid            | Clonostachydiol        | Emodin            |
| 15-Hydroxyculmoron        | Atlantin A               | Colchicin              | Endocrocin        |
| 2-Methylmitorubin         | Atpenin A5               | Communesin B           | Enniatin A        |
| 3-Acetyldeoxynivalenol    | Atropine                 | Cordycepin             | Enniatin A1       |
| 3-Hydroxyterphenyllin     | Atroventinmethylether    | Coumestrol             | Enniatin B        |
| 3-Nitropropionic acid     | Aurantiamin A            | Culmorin               | Enniatin B1       |
| 4-Hydroxyalternariol      | Aurantine                | Curvularin             | Enniatin B2       |
| 5-Hydroxyculmorin         | Aurantioclavin           | Curvulin               | Enniatin B3       |
| 5-Methoxysterigmatocystin | Aurasperon B             | cyclo(L-Leu-L-Pro)     | Epiequisetin      |
| 5-Methylmellein           | Aurasperon C             | cyclo(L-Pro-L-Tyr)     | Epoxyagroclavin   |
| 5-O-Methylsulochrin       | Aurasperon G             | cyclo(L-Pro-L-Val)     | Epoxychochalsin C |
| 7-Hydroxykaurenolide      | Aurofusarin              | Cycloaspeptide A       | Equisetin         |
| 7-Hydroxypestalotin       | Austinol                 | Cycloheximide          | Eremofortin A     |
| Abscisic acid             | Averantin                | Cyclopenin             | Eremofortin B     |
| Acuminatum B              | Averantinmethylether     | Cyclophenol            | Ergine            |
| Acuminatum C              | Averufanin               | Cyclopeptide           | Ergocornine       |
| Aflatoxicol               | Averufin                 | Cyclopiazonic acid     | Ergocorninin      |
| Aflatoxin B1              | Bacitracin               | Cylindrocarpon A4      | Ergocristine      |
| Aflatoxin B2              | Bafilomycin A1           | Cylindrol B            | Ergocristinine    |
| Aflatoxin G1              | Barceloneic acid         | Cytochalasin B         | Ergocryptine      |
| Aflatoxin G2              | Bassianolide             | Cytochalasin C         | Ergocryptinine    |
| Aflatoxin M1              | Beauvericin              | Cytochalasin D         | Ergometrine       |
| Aflatrem                  | Berkedrimane B           | Cytochalasin E         | Ergometrinine     |
| Agroclavine               | beta-Zearalenol          | Cytochalasin H         | Ergosin           |
| Alamethicin               | Bikaverin                | Cytochalasin J         | Ergosinin         |
| alpha-Zearalenol          | Biochanin                | Daidzein               | Ergotamine        |
| Alteichin                 | Bis(methylthio)gliotoxin | Daidzin                | Ergotaminine      |
| Altenuene                 | BisdethioMTG             | Deacetylneosalinol     | Ergovalin         |
| Altenusin                 | Brefeldin A              | Decalonectrin          | Erucifolin        |
| Alternariol               | Brevianamid F            | Dechlorogriseofulvin   | Europin           |
| Alternariolmethylether    | Brevicompanine B         | Dechloronornidulin     | Europin-N-Oxid    |
| Altersetin                | Butenolid                | Dehydroaustinol        | Fallacinol        |
| Altersolanol              | Butyrolacton III         | Dehydrocurvularin      | Fellutanine A     |
| Altetoxin-I               | Butyrolactone I          | Dehydrocyclopeptide    | Festoclavine      |
| Amauromine                | Calonectrin              | Demethylsulochrin      | Flavipucin        |
| Aminodimethyloctadecanol  | Calphostin               | Deoxyfusapyron         | Flavoglucin       |
| Amoxycillin               | Calyxanthone             | Deoxynivalenol         | Fonsecin          |
| Amygdalin                 | Carviolin                | Deoxynortryptoquivalin | Formonetin        |
| Anacin                    | Cephalochromin           | Deoxytryptoquivaline A | Fulvic acid       |
| Andrastin A               | Cercosporamide           | Desoxyverrucosidin     | Fumagillin        |
| Andrastin B               | Cercosporin              | Destruxin A            | Fumagillol        |
| Andrastin C               | Cereulide                | Destruxin B            | Fumifungin        |
| Andrastin D               | Chaconin                 | Destruxin-Ed Derivat   | Fumigaclavine     |
| Andrastin Derivative      | Chaetominine             | Diacetoxyscirpenol     | Fumigaclavine C   |

|                                      |                          |                         |                        |
|--------------------------------------|--------------------------|-------------------------|------------------------|
| Anisodamine                          | Chaetoviridin A          | Dichlorodiaportin       | Fumiquinazolin A       |
| Antibiotic F 1849 A                  | Chanoclavin              | Dihydrocitrinone        | Fumiquinazolin D       |
| Antibiotic PF 1052                   | Chevalone B              | Dihydroergosine         | Fumiquinazolin Derivat |
| Antibiotic Y                         | Chevalone C              | Dihydrogriseofulvin     | Fumiquinazolin F       |
| Apicidin                             | Chlamydosporidiol        | Dihydrolysergol         | Fumitremorgin C        |
| Apicidin D2                          | Chlamydosporol           | Dihydrosterigmatocystin | Fumonisin A1           |
| Ascochlorin                          | Chloramphenicol          | Dihydroxycalonectrin    | Fumonisin A1 Vorstufe  |
| Ascofuranone                         | Chlorocitreorsein        | Dihydroxymellein        | Fumonisin A2           |
| Aspercolorin                         | Chloronectrin            | DihydroxyZONMethylether | Fumonisin B1           |
| Asperfuran                           | Chlortetracyclin         | Dinactin                | Fumonisin B2           |
| Asperglaucide                        | Chrodrimanin             | Diplodiatoxin           | Fumonisin B3           |
| Asperlactone                         | Chrysogin                | DON-3-glucoside         | Fumonisin B4           |
| Asperloxine A                        | Chrysophanol             | Doxycyclin              | Fumonisin B6           |
| Asperphenamate                       | Citreohybridinol         | Echimidin               | Fungerin               |
| Aspinolid B                          | Citreorsein              | Elymoclavine            | Fusaproliferin         |
| Aspochracin A                        | Citreoviridin            | Emericellamide A        | Fusapyron              |
| Aspterric acid                       | Citreoviridin C          | Emericellamide C        | Fusaren-X              |
| Aspulvinone E                        | Citrinin                 | Emericellamide E        | Fusaric acid           |
| Fusarin C                            | Methylequisetin          | Prelapatin              | Ternatin               |
| Fusarinolic acid                     | Methylfunicone           | Prunasin                | Terphenyllin           |
| Fuscofusarin                         | Methylorsellinic acid    | Pseurotin A             | Terrein                |
| Geldanamycin                         | Methylsulochrin          | Puromycin               | Territrem B            |
| Genistein                            | Mevinolin                | Purpactin A             | Tetracycline           |
| Genistin                             | Mollicellin D            | Purpuride               | Thailandolide B        |
| Gibberellic acid                     | Monactin                 | Pyranonigrin            | Tiamulin               |
| Gibberellin A14                      | Moniliformin             | Pyrenocin A             | Trichodermin           |
| Gibpyron D                           | Monoacetoxyscirpenol     | Pyrenophorol            | Trichotetronine        |
| Gliotoxin                            | Monocerin                | Pyripyropene A          | Trichothecolone        |
| Glyantrypine                         | Monocrotalin             | Pyripyropene D          | Trypacidin             |
| Glycitein                            | Mycophenolic acid        | Pyrophen                | Tryprostatin A         |
| Glycitin                             | Mycophenolic acid IV     | Quadrone                | Tryprostatin B         |
| Griseofulvin                         | Myriocin                 | Questionmycin A         | Tryptophol             |
| Griseophenone B                      | N-Benzoyl-Phenylalanine  | Quinadoline A           | Tryptoquivaline A      |
| Griseophenone C                      | Neocyclocitrinol         | Quinolactacin A         | Tryptoquivaline F      |
| Harzianopyridine                     | Neoechinulin D           | Quinolactacin B         | Tylosin                |
| Heliotrin                            | Neosolaniol              | Quinolone A             | Unugisin E             |
| Heliotrin-N-Oxid                     | Neoxaline                | Radicicol               | Usnic acid             |
| Helvolic acid                        | NG 012                   | Rasfonin                | Valinomycin            |
| Helvolinic acid                      | Nidurufin                | Roquefortine C          | Vermistatin            |
| Heptelidic acid                      | Nigericin                | Roquefortine D          | Verrucofortine         |
| Herquiline A                         | Nigragillin              | Roridin A               | Verrucosidin           |
| HT-2 Glucoside                       | Nivalenol                | Rubellin D              | Verruculotoxin         |
| HT-2 toxin                           | Nivalenol glucoside      | Rubrofusarin            | Versicolorin A         |
| Hydroxycurricularin                  | Nonactin                 | Rugulosin               | Versicolorin C         |
| Hydroxypaspaline                     | Norlichexanthone         | Rugulovasine A          | Violaceic acid         |
| Hydroxysydonic acid                  | Norsolorinic acid        | Rugulovovin             | Violaceol I            |
| Hyoscin                              | Norverrucosidin          | Sambucinol              | Violaceol II           |
| Illicicolin A                        | Notoamide Derivative     | Scalusamid A            | Viomellein             |
| Illicicolin B                        | Ochratoxin A             | Sclerotinin A           | Viridicatin            |
| Illicicolin E                        | Ochratoxin alpha         | Sclerotioramin          | Viridicatol            |
| Illicicolin F                        | Ochratoxin B             | Sclerotiorin            | Viridicatum toxin      |
| Indicin/Intermedin/Lycopsamin        | Ochratoxin C             | Secalonic acid D        | Xanthomegnin           |
| Indicin/Intermedin/Lycopsamin N-Oxid | O-Methylsterigmatocystin | Secalonic acid F        | Xanthotoxin            |
| Infectopyron                         | O-Methylviridicatin      | seco-Sterigmatocystin   | Zearalenone            |
| Integracin A                         | Ononin                   | Senecionin_Senecivernin | Zearalenone-Sulfate    |
| Integracin B                         | Orsellinic acid          | Senkirkin               | Zinndiol               |
| Isofusidienol                        | Oxaline                  | Siccanin                | Zinniamide             |
| Iso-Rhodoptilometrin                 | Oxyskyrin                | Siccanol                | Zinniol                |
| Jacobin                              | Oxytetracyclin           | Sissotrine              |                        |

|                         |                          |                     |
|-------------------------|--------------------------|---------------------|
| Josamycin               | Papyracillic acid A      | Skyrin              |
| K-76 Derivative 4       | Paraherquamide E         | Solanin             |
| Kojic acid              | Paspalic acid            | Sphingofungin B     |
| Koninginin E            | Paspalin                 | Sphingofungin D     |
| Kotantin A              | Paspalitrem A            | Stachybotryamide    |
| Lasiocarpin             | Patulin                  | Stachybotrylactam   |
| Lasiocarpin-N-Oxid      | Paxillin                 | Staurosporin        |
| Lecanoic acid           | Penicillic acid          | Stemphyliperyleneol |
| Linamarin               | Penicillide              | Sterigmatocystin    |
| Lincomycin              | Penicillinate            | Sulochrin           |
| LL-Z 1272e              | Penigequinolone A        | Surfactin A         |
| Lolitrem B              | Penitrem A               | Surfactin B         |
| Lotaustralin            | Pestalotin               | Sydonic acid        |
| Macrosporin             | Phenopyrrozin            | Sydowinin A         |
| Malformin A             | Phomalactone             | Sydowinin B         |
| Malformin A2            | Phomalone                | T-2 Glucoside       |
| Malformin C             | Phomopsolide B           | T-2 toxin           |
| Marcfortine A           | Physcion                 | T2-Tetraol          |
| Marcfortine B           | Pinselin                 | T2-Triol            |
| Marcfortine C           | Porritoxinol             | Tensidol B          |
| Meleagrin               | Prehelminthosporol       | Tentoxin            |
| Methoxysterigmatocystin | Prehelminthosporollacton | Tenuazonic acid     |

Table S2. Botanical composition of the sampled pastures.

| Sample | State | Botanical Composition (Dominant Species) <sup>1</sup> |                             |                           |                            |                           |
|--------|-------|-------------------------------------------------------|-----------------------------|---------------------------|----------------------------|---------------------------|
|        |       | 1                                                     | 2                           | 3                         | 4                          | 5                         |
| 1      | LA    | <i>Lolium perenne</i>                                 | -                           | -                         | -                          | -                         |
| 2      | LA    | <i>Lolium perenne</i>                                 | <i>Trifolium repens</i>     | <i>Dactylis glomerata</i> | -                          | -                         |
| 3      | LA    | <i>Lolium perenne</i>                                 | <i>Trifolium repens</i>     | <i>Poa pratensis</i>      | -                          | -                         |
| 4      | LA    | <i>Phleum pratense</i>                                | <i>Trifolium repens</i>     | -                         | -                          | -                         |
| 5      | LA    | <i>Lolium perenne</i>                                 | <i>Trifolium repens</i>     | -                         | -                          | -                         |
| 6      | UA    | <i>Lolium perenne</i>                                 | <i>Trifolium repens</i>     | <i>Medicago sativa</i>    | -                          | -                         |
| 7      | UA    | <i>Lolium perenne</i>                                 | <i>Medicago sativa</i>      | -                         | -                          | -                         |
| 8      | UA    | <i>Lolium perenne</i>                                 | <i>Trifolium pratense</i>   | <i>Dactylis glomerata</i> | -                          | -                         |
| 9      | UA    | <i>Lolium perenne</i>                                 | <i>Trifolium repens</i>     | -                         | -                          | -                         |
| 10     | UA    | <i>Lolium perenne</i>                                 | <i>Trifolium repens</i>     | -                         | -                          | -                         |
| 11     | ST    | <i>Lolium perenne</i>                                 | <i>Alopecurus pratensis</i> | <i>Holcus lanatus</i>     | <i>Poa pratensis</i>       | -                         |
| 12     | ST    | <i>Poa pratensis</i>                                  | <i>Alopecurus pratensis</i> | <i>Festuca pratensis</i>  | -                          | -                         |
| 13     | ST    | <i>Dactylis glomerata</i>                             | <i>Phleum pratense</i>      | <i>Trifolium repens</i>   | <i>Cynosurus cristatus</i> | <i>Festuca pratensis</i>  |
| 14     | ST    | <i>Lolium perenne</i>                                 | <i>Trifolium repens</i>     | <i>Dactylis glomerata</i> | <i>Agrostis sp.</i>        | -                         |
| 15     | ST    | <i>Dactylis glomerata</i>                             | <i>Trifolium repens</i>     | -                         | -                          | -                         |
| 16     | ST    | <i>Lolium perenne</i>                                 | <i>Medicago sativa</i>      | <i>Buglossoides sp.</i>   | <i>Cynosurus cristatus</i> | <i>Dactylis glomerata</i> |
| 17     | ST    | <i>Lolium perenne</i>                                 | <i>Trifolium repens</i>     | -                         | -                          | -                         |
| 18     | ST    | <i>Dactylis glomerata</i>                             | <i>Trifolium repens</i>     | -                         | -                          | -                         |

LA: Lower Austria; UP: Upper Austria; ST: Styria; <sup>1</sup> Taxonomical classification based on morphological keys.
